# Supplementary material for: Immune cell and tumor cell-derived CXCL10 is indicative of immunotherapy response in metastatic melanoma
Source: HighWire-hosted journal article supplement (doi:10.1136/jitc-2021-003521), 2021-09-01
Supplement: jitc-2021-003521supp001_data_supplement.pdf [file jitc-2021-003521supp001_data_supplement.pdf]

**Supplementary Figure 1. a** Percentages for numbers of spots (each spot = CXCL10 transcript) in all CD45<sup>+</sup> CXCL10<sup>+</sup> cells on a per patient basis

**b** Percentages for numbers of spots (each dot = CXCL10 transcript) in all Sox10<sup>+</sup> CXCL10<sup>+</sup> cells on a per patient basis

**Supplementary Figure 2.** Percentage CD45<sup>+</sup> cells correlated with average number of spots per cell on a per ROI basis (95% CI).

**Supplementary Figure 3.** Percentage of CD45<sup>+</sup> CXCL10<sup>+</sup> cells correlated with Sox10<sup>+</sup> CXCL10<sup>+</sup> cells on a per patient basis.

**Supplementary Figure 4.** Percentage of all CXCL10<sup>+</sup> cells correlated with Tumor Inflamed Score (TIS), score results categorized into low -1.24 until -0.39, medium -0.39 – 0.46 and high 0.46 – 1.31 (all RNAseq scores log<sub>2</sub>-transformed) (\* = p <0.05).
